# Supplementary material
Source: PubMed Central journal article supplement (PMC4306618)

# Supplementary for “Thymineless death in AML cells via extrinsic pathway”

Leukemia Research

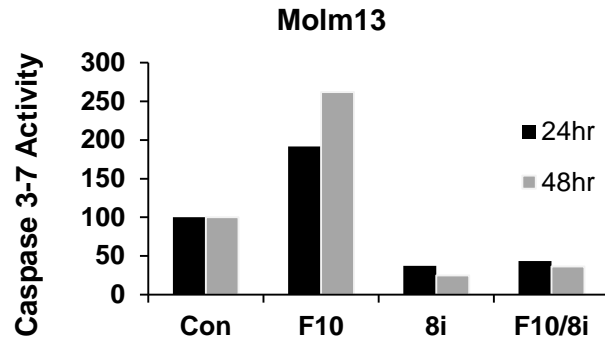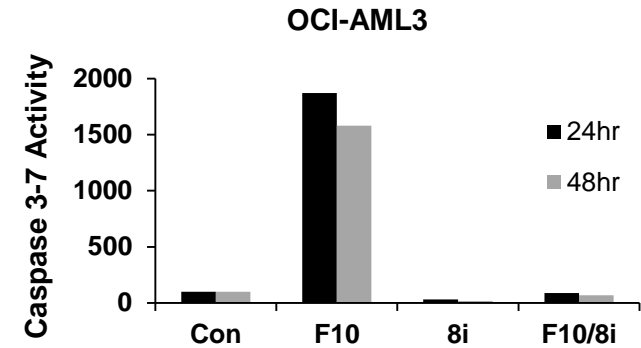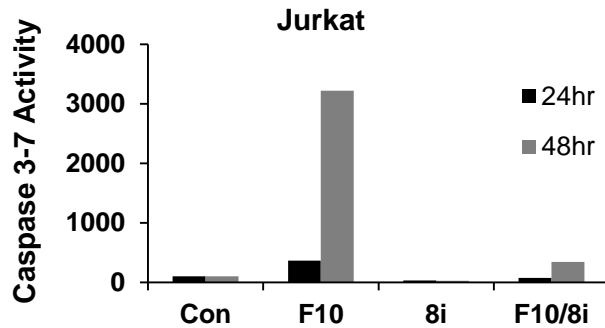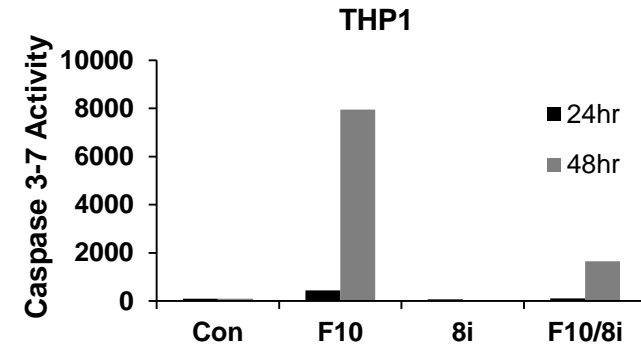

**Supplementary Figure S1:** Caspase-glo 3/7 assay results for Molm13, OCI-AML3, Jurkat, and THP1 cells treated with F10 for either 24 or 48 h. For all cell lines co-treatment with the caspase 8 inhibitory peptide IETD decreased caspase 3/7 activity to control levels consistent with the extrinsic pathway being essential for apoptosis initiation.

A

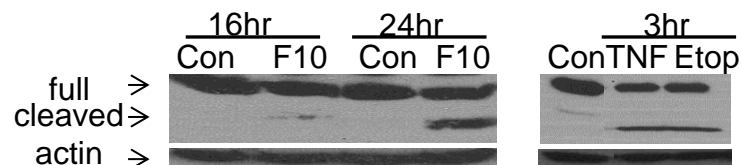

B

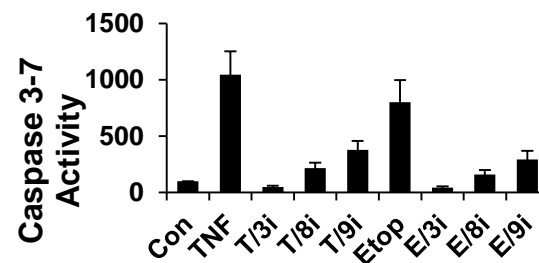

**Supplementary Figure S2:** F10 treatment causes HL-60 cells to undergo a type 2 apoptotic process in which the effects of extrinsic pathway activation are amplified by Bid cleavage leading to caspase 9 activation. (A) Western blot showing cleaved Bid in F10-treated cells and also in HL-60 cells treated with  $\text{TNF}\alpha$  + cycloheximide (0.3 nM/100  $\mu\text{M}$ ; 3 h – TNF or T) or etoposide (100  $\mu\text{M}$ ; 3 h – Etop or E). (B) Caspase glo 3/7 assay showing execution caspase activity is decreased by inhibiting either caspase 8 and caspase 9 in cells treated with  $\text{TNF}\alpha$  (T) or etoposide which is consistent with a type 2 apoptotic process.

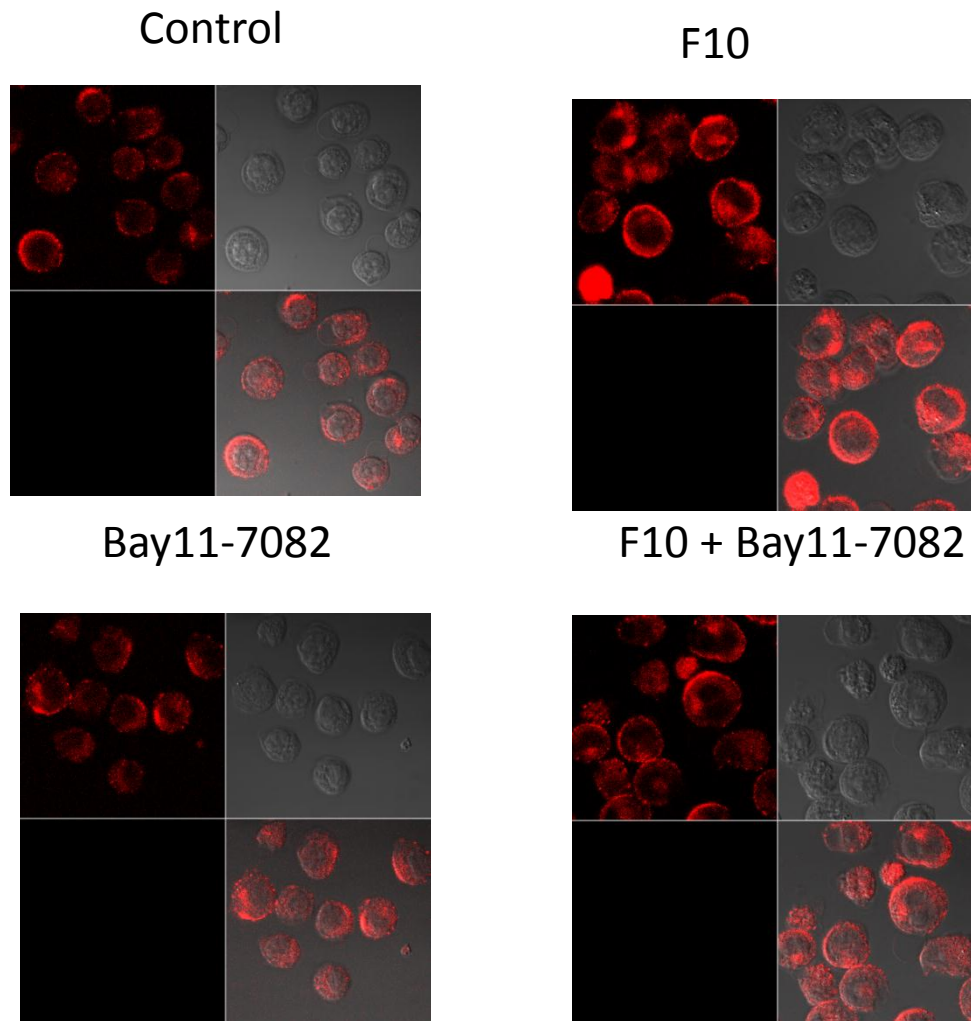

**Supplementary Figure S3:** Confocal Microscopy Images of Fas in HL-60 cells with the indicated treatments. NF- $\kappa$ B inhibition had no apparent effect on Fas localization. Similar results were obtained with FasL (data not shown)

**Supplementary Figure S4:** Results of (left panels) cell-titer glo cell viability assays and caspase 3/7 glo apoptosis assays (right panels) evaluating F10 and simvastatin and combinations of these agents at the indicated concentrations in Molm13, OCI-AML3, and KG1a AML cells

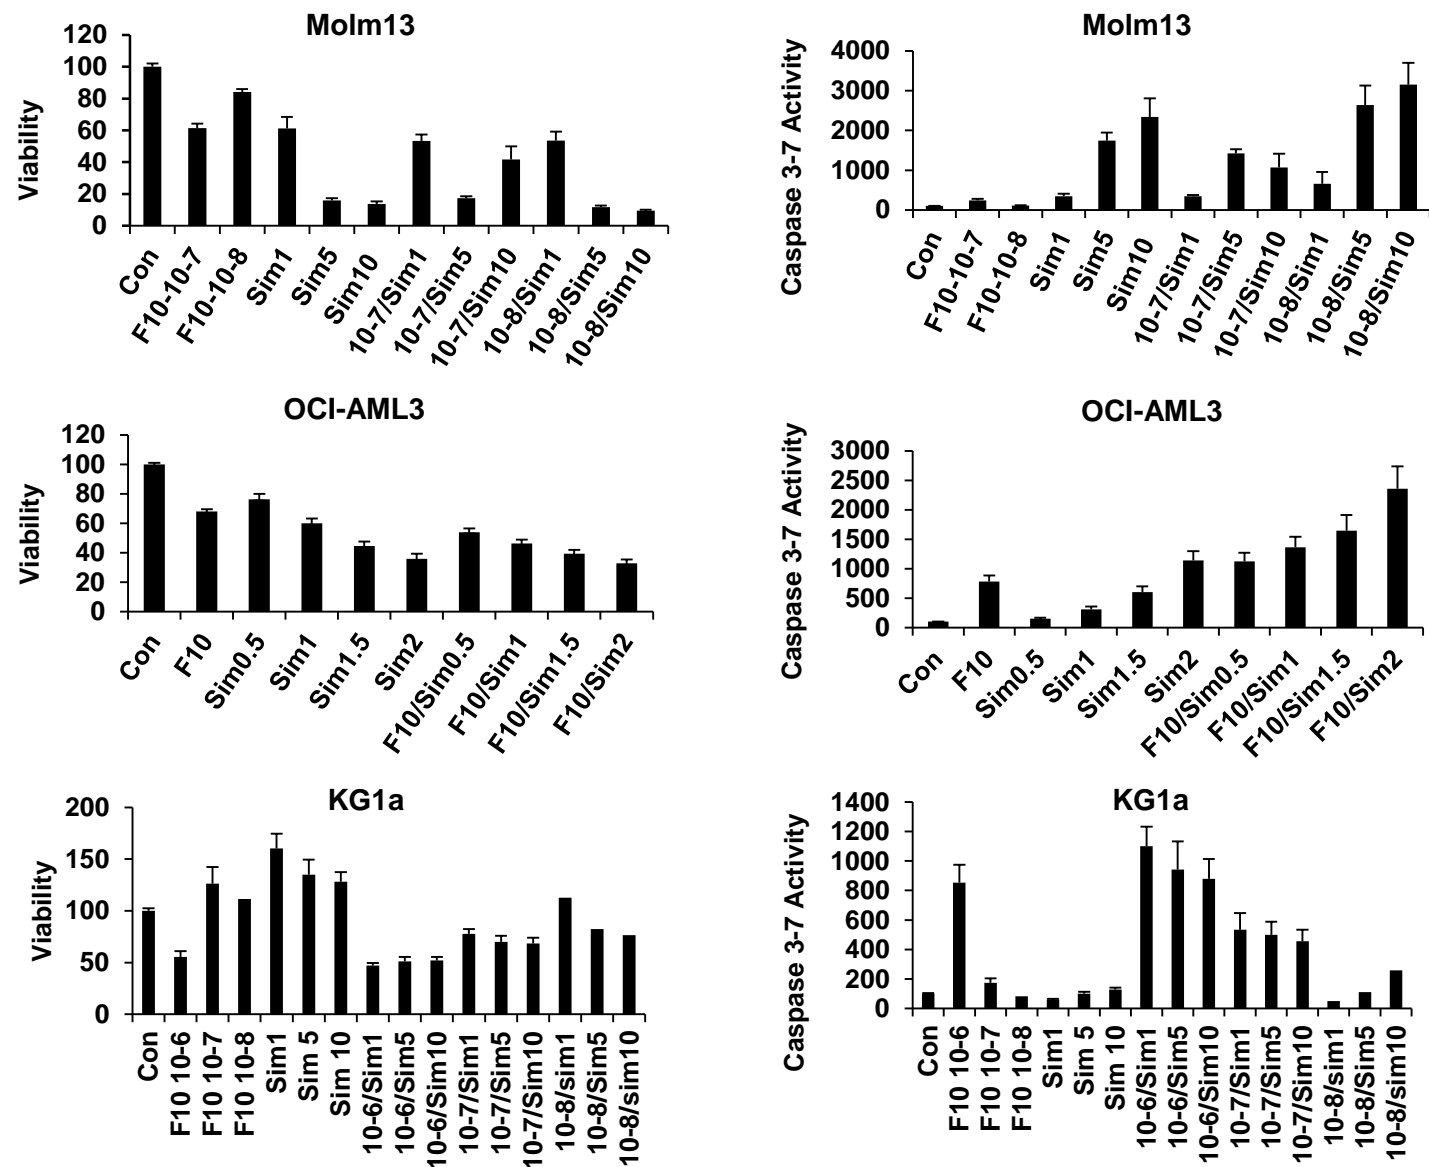

Supplement: NIHMS645757-supplement.pdf [file NIHMS645757-supplement.pdf]
